# Supplementary material for: Hydroxyl group modification improves the electrocatalytic ORR and OER activity of graphene supported single and bi-metal atomic catalysts (Ni, Co, and Fe)
Source: Royal Society of Chemistry journal article supplement (doi:10.1039/c9ta08661g), 2019-01-01
Supplement: c9ta08661g1.pdf [file c9ta08661g1.pdf]

## Hydroxyl Group Modification Improves the Electrocatalytic ORR and OER Activity of Graphene Supported Single and Bi-metal Atomic Catalysts (Ni, Co, Fe)

Xiaomei Zhao<sup>a</sup>, Xia Liu<sup>b</sup>, Baoyu Huang<sup>a</sup>, Pu Wang<sup>a</sup> and Yong Pei<sup>\*a</sup>

<sup>a</sup>Department of Chemistry, Key Laboratory of Environmentally Friendly Chemistry and Application of Ministry of Education, Key Laboratory for Green Organic Synthesis and Application of Hunan Province, Xiangtan University, Hunan Province, Xiangtan 411105, People's Republic of China <sup>b</sup>State Key Laboratory of Chemo/Biosensing and Chemometrics, Hunan University, Changsha 410082, China

Email: [ypei2@xtu.edu.cn](mailto:ypei2@xtu.edu.cn)

### Contents of the Supporting Information

**Figure S1.** The optimized geometrical structures of defective graphene in top views, mainly including the DG (O, I and P).

**Figure S2.** (a)-(c) The free energy diagrams (FEDs) of the OER and ORR processes at zero potential over MM/DG and HO-MM/DG. (d) The linear relationship between free energies of adsorption of oxygenated intermediates over M-M bridge center of MM/DG and M center of (HO)<sub>2</sub>-MM/DG.

**Figure S3.** The project density of states (PDOS) of the d-orbitals of the transition metal atom (M) on bare M/DG and M<sup>1</sup>M<sup>2</sup>/DG. (a) The PDOS of d-orbitals of the M on bare M/DG; (b) The PDOS of d-orbitals of the M on bare MM/DG. (c) The PDOS of d-orbitals of the M<sup>1</sup> and M<sup>2</sup> on bare M<sup>1</sup>M<sup>2</sup>/DG. Pink dotted line denoted the d-band center of transition metal atom M.

**Figure S4.** The  $\Delta G$  (eV) of the various reactions and all intermediates configurations of OER and ORR process on Co/DG, Fe/DG and (O)<sub>3</sub>-CoFe/DG.

**Table S1-S3.** The  $\Delta E_{\text{ads}}$  (eV) and  $\Delta G_{\text{ads}}$  (eV) of oxygenated intermediates involved in OER and ORR on bare and hydroxylated M/DG, MM/DG and M<sup>1</sup>M<sup>2</sup>/DG.

**Table S4-S8.** The  $\Delta G$  of various reactions (eV) and  $\eta$  (V) involved in the OER and ORR over bare and hydroxylated M/DG, MM/DG and M<sup>1</sup>M<sup>2</sup>/DG.

**Table S9.** Zero point energy corrections (ZPE) and entropic contributions (TS) and total energies (E) to the Gibbs free energies.

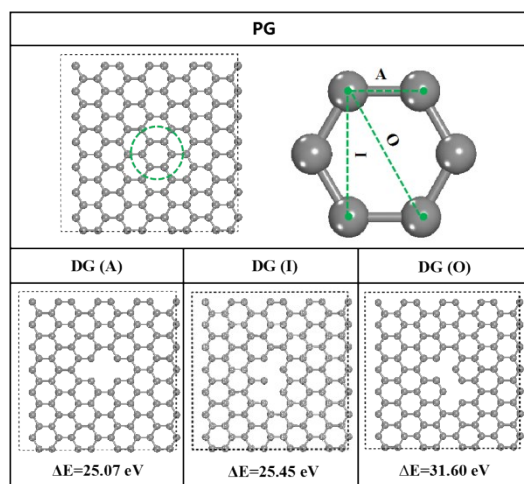

**Figure S1.** The optimized geometrical structures of defective graphene in top views, mainly including the DG (O, I and P).

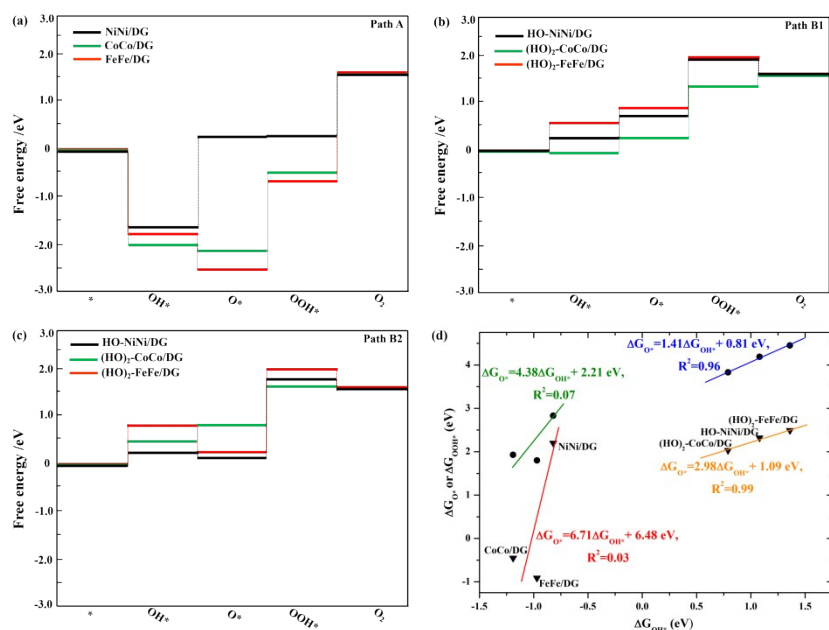

**Figure S2** (a) The free energy diagrams (FEDs) of the OER and ORR processes at zero potential over M-M bridge center of MM/DG. (b) The free energy diagrams (FEDs) of the OER and ORR processes at zero potential over M center of HO-M/DG (Path B1). (c) The free energy diagrams (FEDs) of the OER and ORR processes at zero potential over M-M bridge center of (HO)<sub>2</sub>-MM/DG (Path B2). (d) The linear relationship between free energies of adsorption of oxygenated intermediates over M-M bridge center of MM/DG and M center of (HO)<sub>2</sub>-MM/DG.

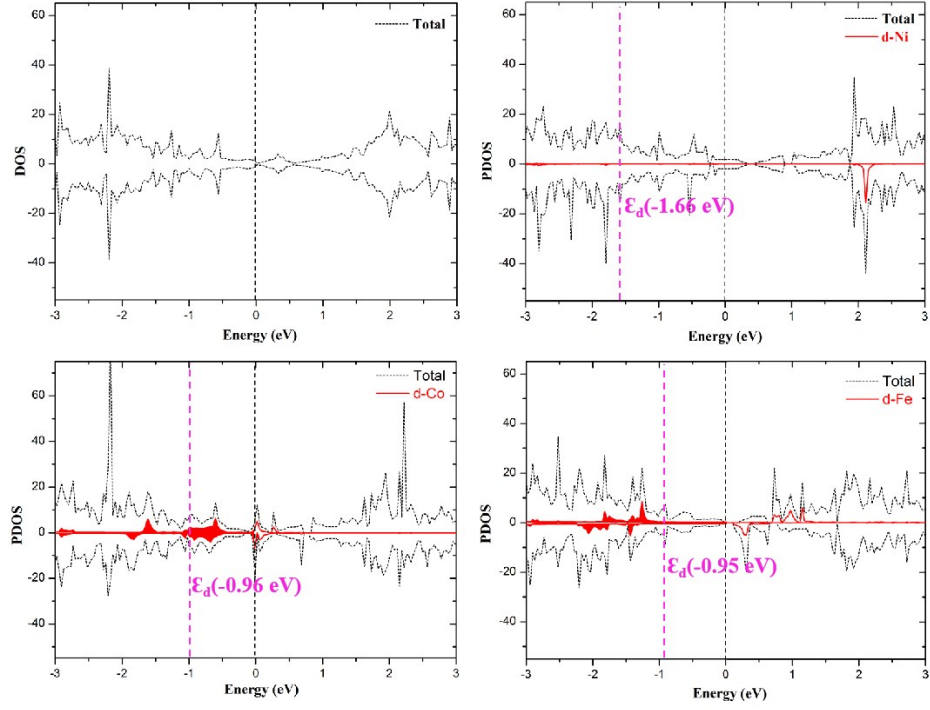

(a)

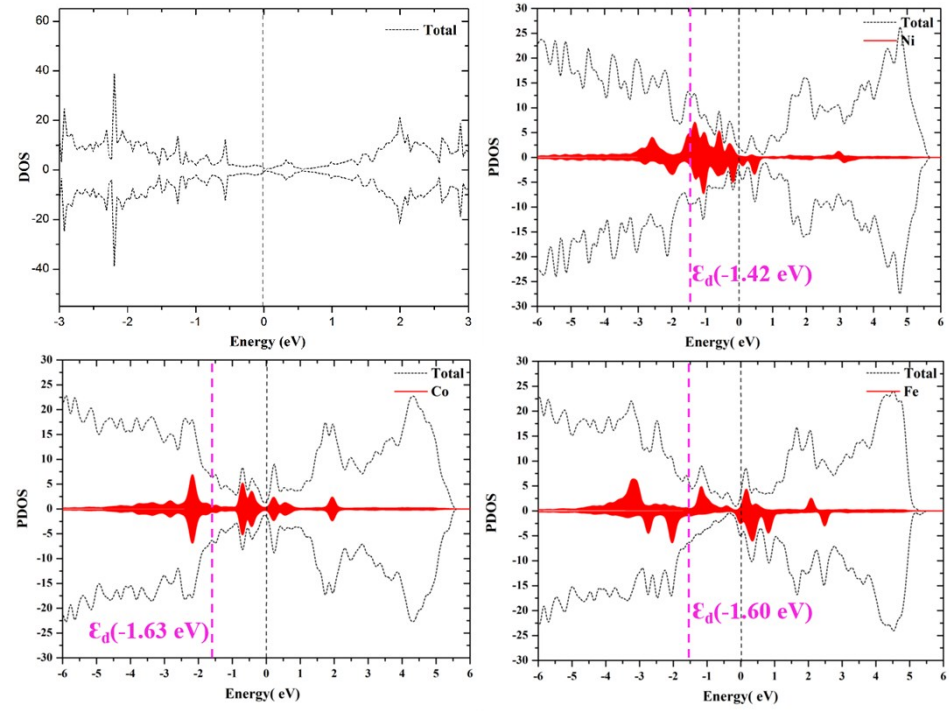

(b)

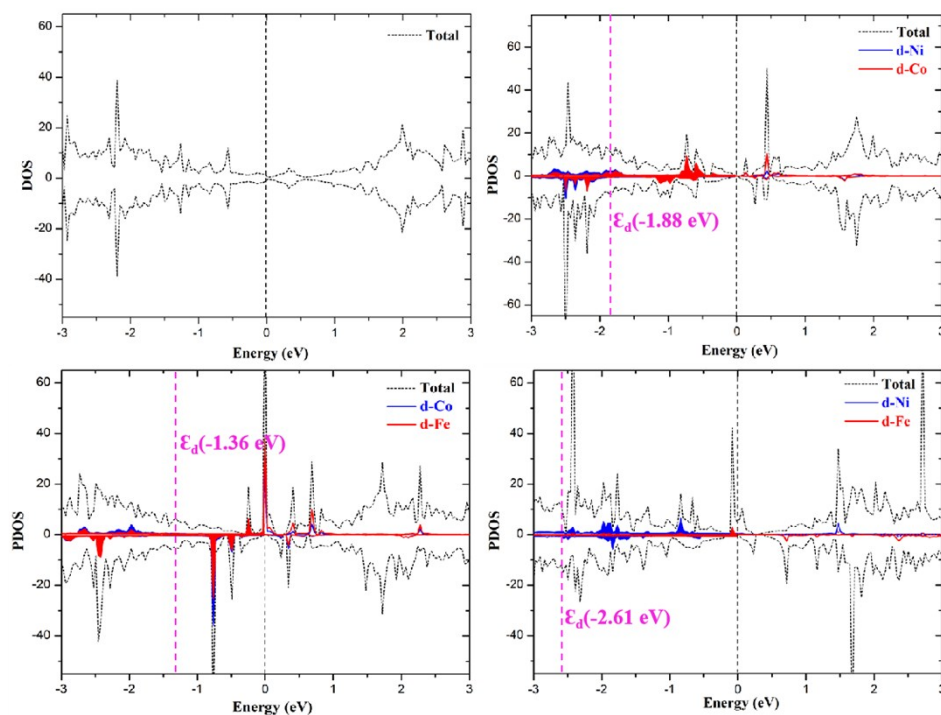

(c)

**Figure S3.** The project density of states (PDOS) of the d-orbitals of the transition metal atom (M) on bare M/DG and  $M^1M^2$ /DG. (a) The PDOS of d-orbitals of the M on bare M/DG. (b) The PDOS of d-orbitals of the M on bare MM/DG. (c) The PDOS of d-orbitals of the  $M^1$  and  $M^2$  on bare  $M^1M^2$ /DG. Pink dotted line denoted the d-band center of transition metal atom M.

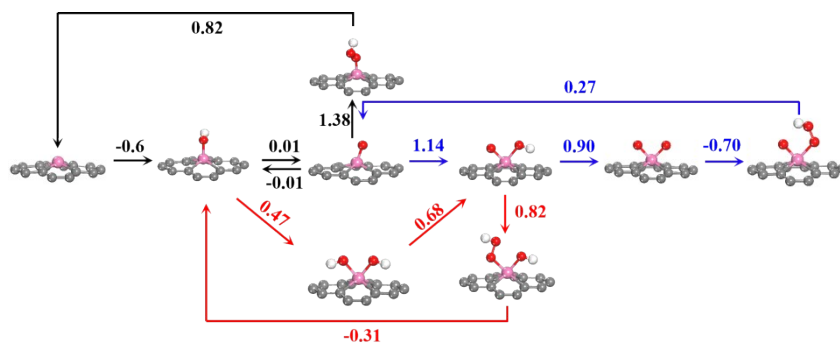

(a)

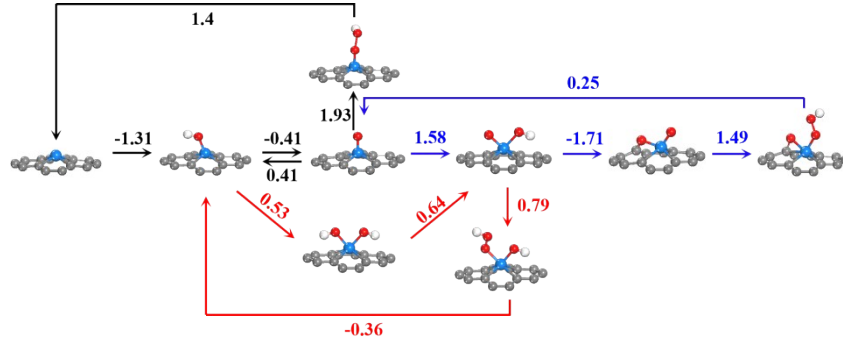

(b)

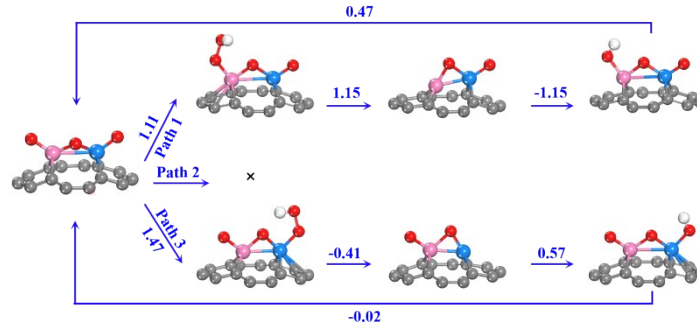

(c)

**Figure S4.** (a) The  $\Delta G$  (eV) of the various reactions and all intermediates configurations of OER and ORR process on Co/DG. (b) The  $\Delta G$  (eV) of the various reactions and all intermediates configurations of OER and ORR process on Fe/DG. (c) The  $\Delta G$  (eV) of the various reactions and all intermediates configurations of OER and ORR process on (O)<sub>3</sub>-CoFe/DG.

**Table S1.** The  $\Delta E_{\text{ads}}$  (eV) and  $\Delta G_{\text{ads}}$  (eV) of oxygenated intermediates involved in OER and ORR on bare and hydroxylated M/DG.

| Oxygenated Intermediates   | Ni/DG (eV) | Co/DG (eV) | Fe/DG (eV) |
|----------------------------|------------|------------|------------|
| <i>M center of M/DG</i>    |            |            |            |
| $\Delta E_{\text{OH}^*}$   | 0.71       | -0.06      | -0.77      |
| $\Delta G_{\text{OH}^*}$   | 0.99       | 0.22       | -0.48      |
| $\Delta E_{\text{O}^*}$    | 2.47       | 1.05       | -0.08      |
| $\Delta G_{\text{O}^*}$    | 2.48       | 1.06       | -0.07      |
| $\Delta E_{\text{OOH}^*}$  | 3.75       | 3.04       | 2.47       |
| $\Delta G_{\text{OOH}^*}$  | 3.98       | 3.27       | 2.69       |
| $\Delta E_{\text{O}_2^*}$  | -0.08      | -0.90      | -1.20      |
| $\Delta G_{\text{O}_2^*}$  | -0.07      | -0.89      | -1.19      |
| <i>M center of HO-M/DG</i> |            |            |            |
| $\Delta E_{\text{OH}^*}$   | —          | 0.93       | 0.99       |
| $\Delta G_{\text{OH}^*}$   | —          | 1.3        | 1.35       |

|                    |   |      |      |
|--------------------|---|------|------|
| $\Delta E_{O^*}$   | — | 2.85 | 2.88 |
| $\Delta G_{O^*}$   | — | 2.87 | 2.82 |
| $\Delta E_{OOH^*}$ | — | 4.05 | 4.11 |
| $\Delta G_{OOH^*}$ | — | 4.45 | 4.44 |
| $\Delta E_{O_2^*}$ | — | 0.28 | 0.65 |
| $\Delta G_{O_2^*}$ | — | 0.51 | 0.88 |

**Table S2.** The  $\Delta E_{ads}$  (eV) and  $\Delta G_{ads}$  (eV) of oxygenated intermediates involved in OER and ORR on bare and hydroxylated MM/DG.

| Oxygenated Intermediates                                      | NiNi/DG     | CoCo/DG (eV) | FeFe/DG (eV) |
|---------------------------------------------------------------|-------------|--------------|--------------|
| <i>M-M bridge center of MM/DG</i>                             |             |              |              |
| $\Delta E_{OH^*}$                                             | -1.11       | -1.48        | -1.26        |
| $\Delta G_{OH^*}$                                             | -0.82       | -1.19        | -0.97        |
| $\Delta E_{O^*}$                                              | 1.99        | -0.46        | -0.92        |
| $\Delta G_{O^*}$                                              | 2.00        | -0.45        | -0.91        |
| $\Delta E_{OOH^*}$                                            | 2.61        | 1.71         | 1.58         |
| $\Delta G_{OOH^*}$                                            | 2.83        | 1.93         | 1.80         |
| $\Delta E_{O_2^*}$                                            | -1.95       | -1.68        | -1.84        |
| $\Delta G_{O_2^*}$                                            | -1.94       | -1.67        | -1.83        |
| <i>M center / M-M bridge center of (HO)<sub>2</sub>-MM/DG</i> |             |              |              |
| $\Delta E_{OH^*}$                                             | 0.72        | 0.33/0.84    | 0.91/1.11    |
| $\Delta G_{OH^*}$                                             | 1.08        | 0.79/1.30    | 1.36/1.56    |
| $\Delta E_{O^*}$                                              | 2.38/1.86   | 1.95/2.31    | 2.41/1.87    |
| $\Delta G_{O^*}$                                              | 2.32/1.89   | 2.03/2.40    | 2.49/1.95    |
| $\Delta E_{OOH^*}$                                            | 3.85/3.89   | 3.45/3.76    | 4.07/4.01    |
| $\Delta G_{OOH^*}$                                            | 4.19/4.23   | 3.83/4.15    | 4.45/4.39    |
| $\Delta E_{O_2^*}$                                            | -0.23/-0.65 | -1.12/-0.30  | -0.36/-0.01  |
| $\Delta G_{O_2^*}$                                            | 0.00/-0.09  | -0.56/0.26   | 0.20/0.55    |

**Table S3.** The  $\Delta E_{ads}$  (eV) and  $\Delta G_{ads}$  (eV) of oxygenated intermediates involved in OER and ORR process on bare and hydroxylated M<sup>1</sup>M<sup>2</sup>/DG.

| Oxygenated Intermediates                                                          | NiCo/DG (eV) | CoFe/DG (eV) | NiFe/DG (eV) |
|-----------------------------------------------------------------------------------|--------------|--------------|--------------|
| <i>M<sup>1</sup>-M<sup>2</sup> bridge center of M<sup>1</sup>M<sup>2</sup>/DG</i> |              |              |              |
| $\Delta E_{OH^*}$                                                                 | -1.28        | -1.78        | -0.26        |
| $\Delta G_{OH^*}$                                                                 | -0.99        | -1.49        | 0.03         |
| $\Delta E_{O^*}$                                                                  | -0.35        | -0.95        | 0.78         |
| $\Delta G_{O^*}$                                                                  | -0.35        | -0.94        | 0.79         |
| $\Delta E_{OOH^*}$                                                                | 1.98         | 1.52         | 3.00         |

|                                                                                                                                                  |                   |                   |                   |
|--------------------------------------------------------------------------------------------------------------------------------------------------|-------------------|-------------------|-------------------|
| $\Delta G_{\text{OOH}^*}$                                                                                                                        | 2.20              | 1.74              | 3.23              |
| $\Delta E_{\text{O}_2^*}$                                                                                                                        | -1.49             | -1.97             | -1.68             |
| $\Delta G_{\text{O}_2^*}$                                                                                                                        | -1.48             | -1.96             | -1.67             |
| <i>M<sup>1</sup> center / M<sup>1</sup>-M<sup>2</sup> bridge center / M<sup>2</sup> center of (HO)<sub>2</sub>-M<sup>1</sup>M<sup>2</sup>/DG</i> |                   |                   |                   |
| $\Delta E_{\text{OH}^*}$                                                                                                                         | 0.50/0.38/0.10    | 0.67/0.74/0.22    | 0.86/0.57/-0.41   |
| $\Delta G_{\text{OH}^*}$                                                                                                                         | 0.96/0.84/0.54    | 1.12/1.19/0.68    | 1.31/1.02/0.04    |
| $\Delta E_{\text{O}^*}$                                                                                                                          | 2.75/1.73/1.69    | 2.24/1.49/1.45    | 3.05/1.50/0.45    |
| $\Delta G_{\text{O}^*}$                                                                                                                          | 2.83/1.82/1.77    | 2.32/1.57 /1.53   | 3.13/1.58/0.53    |
| $\Delta E_{\text{OOH}^*}$                                                                                                                        | 3.73/3.36/3.42    | 3.68/3.57 /3.11   | 3.62/3.13/2.15    |
| $\Delta G_{\text{OOH}^*}$                                                                                                                        | 4.12/3.74/3.80    | 4.06/3.96 /3.49   | 4.00/3.51/2.53    |
| $\Delta E_{\text{O}_2^*}$                                                                                                                        | -0.80/-0.60/-1.41 | -0.83/-0.49/-1.38 | -0.53/-0.77/-2.14 |
| $\Delta G_{\text{O}_2^*}$                                                                                                                        | -0.24/-0.04/-0.85 | -0.27/0.07/-0.82  | 0.03/-0.21/-1.58  |

**Table S4.** The  $\Delta G$  of various reactions (eV) and  $\eta$  (V) for the OER and ORR process over bare and hydroxylated M/DG.

| Reactions                                                                                 | $\Delta G(\text{eV})$ | $\eta(\text{V})$         | $\Delta G(\text{eV})$ | $\eta(\text{V})$         | $\Delta G(\text{eV})$ | $\eta(\text{V})$         |
|-------------------------------------------------------------------------------------------|-----------------------|--------------------------|-----------------------|--------------------------|-----------------------|--------------------------|
|                                                                                           | Ni/DG                 |                          | Co/DG                 |                          | Fe/DG                 |                          |
| <i>M center of M/DG</i>                                                                   |                       |                          |                       |                          |                       |                          |
| $\text{OH}^- + * \rightarrow \text{OH}^* + \text{e}^-$                                    | 0.17                  | $\eta^{\text{OER}}=0.27$ | -0.6                  | $\eta^{\text{OER}}=0.98$ | -1.31                 | $\eta^{\text{OER}}=1.53$ |
| $\text{OH}^- + \text{OH}^* \rightarrow \text{O}^* + \text{H}_2\text{O} + \text{e}^-$      | 0.66                  |                          | 0.01                  |                          | -0.41                 |                          |
| $\text{OH}^- + \text{O}^* \rightarrow \text{OOH}^* + \text{e}^-$                          | 0.67                  | $\eta^{\text{ORR}}=0.29$ | 1.38                  | $\eta^{\text{ORR}}=1.00$ | 1.93                  | $\eta^{\text{ORR}}=1.71$ |
| $\text{OH}^- + \text{OOH}^* \rightarrow * + \text{O}_2 + \text{H}_2\text{O} + \text{e}^-$ | 0.11                  |                          | 0.82                  |                          | 1.4                   |                          |
| <i>M center of HO-M/DG</i>                                                                |                       |                          |                       |                          |                       |                          |
| $\text{OH}^- + * \rightarrow \text{OH}^* + \text{e}^-$                                    | —                     | —                        | 0.47                  | $\eta^{\text{OER}}=0.36$ | 0.53                  | $\eta^{\text{OER}}=0.39$ |
| $\text{OH}^- + \text{OH}^* \rightarrow \text{O}^* + \text{H}_2\text{O} + \text{e}^-$      | —                     |                          | 0.68                  |                          | 0.64                  |                          |
| $\text{OH}^- + \text{O}^* \rightarrow \text{OOH}^* + \text{e}^-$                          | —                     | —                        | 0.77                  | $\eta^{\text{ORR}}=0.71$ | 0.79                  | $\eta^{\text{ORR}}=0.76$ |
| $\text{OH}^- + \text{OOH}^* \rightarrow * + \text{O}_2 + \text{H}_2\text{O} + \text{e}^-$ | —                     |                          | -0.31                 |                          | -0.36                 |                          |

**Table S5.** The  $\Delta G$  of various reactions (eV) and  $\eta$  (V) for the OER and ORR process over bare and hydroxylated MM/DG.

| Reactions                                                                                 | $\Delta G(\text{eV})$ | $\eta(\text{V})$              | $\Delta G(\text{eV})$ | $\eta(\text{V})$              | $\Delta G(\text{eV})$ | $\eta(\text{V})$              |
|-------------------------------------------------------------------------------------------|-----------------------|-------------------------------|-----------------------|-------------------------------|-----------------------|-------------------------------|
|                                                                                           | NiNi/DG               |                               | CoCo/DG               |                               | FeFe/DG               |                               |
| <i>M-M bridge center of MM/DG</i>                                                         |                       |                               |                       |                               |                       |                               |
| $\text{OH}^- + * \rightarrow \text{OH}^* + \text{e}^-$                                    | -1.65                 |                               | -2.02                 |                               | -1.80                 |                               |
| $\text{OH}^- + \text{OH}^* \rightarrow \text{O}^* + \text{H}_2\text{O} + \text{e}^-$      | 1.99                  | $\eta^{\text{OER}}=1.59$      | -0.09                 | $\eta^{\text{OER}}=1.76$      | -0.77                 | $\eta^{\text{OER}}=1.88$      |
| $\text{OH}^- + \text{O}^* \rightarrow \text{OOH}^* + \text{e}^-$                          | 0.01                  | $\eta^{\text{ORR}}=2.05$      | 1.55                  | $\eta^{\text{ORR}}=2.42$      | 1.88                  | $\eta^{\text{ORR}}=2.20$      |
| $\text{OH}^- + \text{OOH}^* \rightarrow * + \text{O}_2 + \text{H}_2\text{O} + \text{e}^-$ | 1.26                  |                               | 2.16                  |                               | 2.29                  |                               |
| <i>M center / M-M bridge center of (HO)<sub>2</sub>-MM/DG</i>                             |                       |                               |                       |                               |                       |                               |
| $\text{OH}^- + * \rightarrow \text{OH}^* + \text{e}^-$                                    | 0.25                  |                               | -0.04/0.47            |                               | 0.53/0.74             |                               |
| $\text{OH}^- + \text{OH}^* \rightarrow \text{O}^* + \text{H}_2\text{O} + \text{e}^-$      | 0.42/-0.10            | $\eta^{\text{OER}}=0.64/1.19$ | 0.41/0.27             | $\eta^{\text{OER}}=0.57/0.52$ | 0.31/-0.44            | $\eta^{\text{OER}}=0.73/1.22$ |
| $\text{OH}^- + \text{O}^* \rightarrow \text{OOH}^* + \text{e}^-$                          | 1.04/1.59             | $\eta^{\text{ORR}}=0.51/0.54$ | 0.97/0.92             | $\eta^{\text{ORR}}=0.44/0.45$ | 1.13/1.62             | $\eta^{\text{ORR}}=0.76/0.84$ |
| $\text{OH}^- + \text{OOH}^* \rightarrow * + \text{O}_2 + \text{H}_2\text{O} + \text{e}^-$ | -0.10/-0.14           |                               | 0.26/-0.05            |                               | -0.37/-               |                               |

**Table S6.** The  $\Delta G$  of various reactions (eV) and  $\eta$  (V) for the OER and ORR process over bare and hydroxylated (HO)<sub>2</sub>-NiCo/DG.

| Reactions                                                                                 | $\Delta G(\text{eV})$ | $\eta(\text{V})$                   |
|-------------------------------------------------------------------------------------------|-----------------------|------------------------------------|
| <i>Ni-Co bridge center of NiCo/DG</i>                                                     |                       |                                    |
| $\text{OH}^- + * \rightarrow \text{OH}^* + \text{e}^-$                                    | -1.82                 |                                    |
| $\text{OH}^- + \text{OH}^* \rightarrow \text{O}^* + \text{H}_2\text{O} + \text{e}^-$      | -0.18                 | $\eta^{\text{OER}}=1.49$           |
| $\text{OH}^- + \text{O}^* \rightarrow \text{OOH}^* + \text{e}^-$                          | 1.72                  | $\eta^{\text{ORR}}=2.22$           |
| $\text{OH}^- + \text{OOH}^* \rightarrow * + \text{O}_2 + \text{H}_2\text{O} + \text{e}^-$ | 1.89                  |                                    |
| <i>Ni center / Ni-Co bridge center / Co center of (HO)<sub>2</sub>-NiCo/DG</i>            |                       |                                    |
| $\text{OH}^- + * \rightarrow \text{OH}^* + \text{e}^-$                                    | 0.13/0.01/-0.27       |                                    |
| $\text{OH}^- + \text{OH}^* \rightarrow \text{O}^* + \text{H}_2\text{O} + \text{e}^-$      | 1.04/0.15/0.38        | $\eta^{\text{OER}}=0.64/0.69/0.81$ |
| $\text{OH}^- + \text{O}^* \rightarrow \text{OOH}^* + \text{e}^-$                          | 0.46/1.09/1.21        | $\eta^{\text{ORR}}=0.43/0.39/0.67$ |
| $\text{OH}^- + \text{OOH}^* \rightarrow * + \text{O}_2 + \text{H}_2\text{O} + \text{e}^-$ | -0.03/0.35/0.28       |                                    |

**Table S7.** The  $\Delta G$  of various reactions (eV) and  $\eta$  (V) for the OER and ORR process over bare and hydroxylated (HO)<sub>2</sub>-CoFe/DG.

| Reactions                                                                                 | $\Delta G(\text{eV})$ | $\eta(\text{V})$         |
|-------------------------------------------------------------------------------------------|-----------------------|--------------------------|
| <i>Co-Fe bridge center of CoFe/DG</i>                                                     |                       |                          |
| $\text{OH}^- + * \rightarrow \text{OH}^* + \text{e}^-$                                    | -2.32                 |                          |
| $\text{OH}^- + \text{OH}^* \rightarrow \text{O}^* + \text{H}_2\text{O} + \text{e}^-$      | -0.28                 | $\eta^{\text{OER}}=1.95$ |
| $\text{OH}^- + \text{O}^* \rightarrow \text{OOH}^* + \text{e}^-$                          | 1.85                  | $\eta^{\text{ORR}}=2.72$ |
| $\text{OH}^- + \text{OOH}^* \rightarrow * + \text{O}_2 + \text{H}_2\text{O} + \text{e}^-$ | 2.35                  |                          |
| <i>Co center / Co-Fe bridge center / Fe center of (HO)<sub>2</sub>-CoFe/DG</i>            |                       |                          |



|                                                                                           |                 |                                    |
|-------------------------------------------------------------------------------------------|-----------------|------------------------------------|
| $\text{OH}^- + * \rightarrow \text{OH}^* + \text{e}^-$                                    | 0.29/0.37/-0.15 | $\eta^{\text{OER}}=0.50/1.16/0.73$ |
| $\text{OH}^- + \text{OH}^* \rightarrow \text{O}^* + \text{H}_2\text{O} + \text{e}^-$      | 0.37/-0.45/0.02 |                                    |
| $\text{OH}^- + \text{O}^* \rightarrow \text{OOH}^* + \text{e}^-$                          | 0.90/1.56/1.13  | $\eta^{\text{ORR}}=0.36/0.85/0.55$ |
| $\text{OH}^- + \text{OOH}^* \rightarrow * + \text{O}_2 + \text{H}_2\text{O} + \text{e}^-$ | 0.04/0.13/0.60  |                                    |

**Table S8.** The  $\Delta G$  of various reactions (eV) and  $\eta$  (V) for the OER and ORR process over bare and hydroxylated  $(\text{HO})_2\text{-NiFe/DG}$ .

| Reactions                                                                                 | $\Delta G(\text{eV})$ | $\eta(\text{V})$                   |
|-------------------------------------------------------------------------------------------|-----------------------|------------------------------------|
| <i>Ni-Fe bridge center of NiFe/DG</i>                                                     |                       |                                    |
| $\text{OH}^- + * \rightarrow \text{OH}^* + \text{e}^-$                                    | -0.79                 | $\eta^{\text{OER}}=1.21$           |
| $\text{OH}^- + \text{OH}^* \rightarrow \text{O}^* + \text{H}_2\text{O} + \text{e}^-$      | -0.07                 |                                    |
| $\text{OH}^- + \text{O}^* \rightarrow \text{OOH}^* + \text{e}^-$                          | 1.62                  | $\eta^{\text{ORR}}=1.19$           |
| $\text{OH}^- + \text{OOH}^* \rightarrow * + \text{O}_2 + \text{H}_2\text{O} + \text{e}^-$ | 0.86                  |                                    |
| <i>Ni center / Ni-Fe bridge center / Fe center of (HO)<sub>2</sub>-NiFe/DG</i>            |                       |                                    |
| $\text{OH}^- + * \rightarrow \text{OH}^* + \text{e}^-$                                    | 0.48/0.19/-0.78       | $\eta^{\text{OER}}=0.59/0.70/1.19$ |
| $\text{OH}^- + \text{OH}^* \rightarrow \text{O}^* + \text{H}_2\text{O} + \text{e}^-$      | 0.99/-0.27/-0.34      |                                    |
| $\text{OH}^- + \text{O}^* \rightarrow \text{OOH}^* + \text{e}^-$                          | 0.05/1.10/1.17        | $\eta^{\text{ORR}}=0.35/0.69/1.16$ |
| $\text{OH}^- + \text{OOH}^* \rightarrow * + \text{O}_2 + \text{H}_2\text{O} + \text{e}^-$ | 0.08/0.58/1.56        |                                    |

**Table S9.** Zero point energy corrections (ZPE) and entropic contributions (TS) and total energies (E) to the free Energies.

| Species                                                                                       | ZPE (eV) | TS (eV) | E (eV) |
|-----------------------------------------------------------------------------------------------|----------|---------|--------|
| $\text{H}_2$                                                                                  | 0.27     | 0.41    | -6.76  |
| $\text{H}_2\text{O}$                                                                          | 0.56     | 0.67    | -14.22 |
| <i>M/DG / MM/DG / M<sup>1</sup>M<sup>2</sup>/DG</i>                                           |          |         |        |
| $\text{OH}^*$                                                                                 | 0.33     | 0.08    | —      |
| $\text{O}^*$                                                                                  | 0.08     | 0.05    | —      |
| $\text{OOH}^*$                                                                                | 0.39     | 0.16    | —      |
| $\text{O}_2^*$                                                                                | 0.14     | 0.15    | —      |
| <i>HO-M/DG / HO-NiNi/DG</i>                                                                   |          |         |        |
| HO-M/DG                                                                                       | 0.33     | 0.08    | —      |
| $\text{OH}^*$                                                                                 | 0.73     | 0.17    | —      |
| $\text{O}^*$                                                                                  | 0.42     | 0.20    | —      |
| $\text{OOH}^*$                                                                                | 0.82     | 0.25    | —      |
| $\text{O}_2^*$                                                                                | 0.49     | 0.26    | —      |
| <i><math>(\text{HO})_2\text{-MM/DG} / (\text{HO})_2\text{-M}^1\text{M}^2/\text{DG}</math></i> |          |         |        |
| $(\text{HO})_2\text{-M}^1\text{M}^2/\text{DG}$                                                | 0.69     | 0.25    | —      |
| $\text{OH}^*$                                                                                 | 1.10     | 0.24    | —      |
| $\text{O}^*$                                                                                  | 0.80     | 0.25    | —      |

|                  |      |      |   |
|------------------|------|------|---|
| OOH*             | 1.15 | 0.34 | — |
| O <sub>2</sub> * | 0.87 | 0.31 | — |
